# Supplementary material for: nGASP – the nematode genome annotation assessment project
Source: Springer Nature journal article supplement (doi:10.1186/1471-2105-9-549), 2008-12-01
Supplement: Additional file 1 [file 1471-2105-9-549-s1.doc]

# The nGASP Consortium

geseca: Darin Blasiar1

n-scan: Randall H. Brown2, Michael R. Brent2

genomix: Avril Coghlan3, Richard Durbin3

GeneID and sgp2: Tyler Alioto4, Francisco Câmara4, Roderic Guigó4

snap: Ian Korf5

Gramene: Chengzhi Liang6, Doreen Ware6,7, Lincoln Stein7

GeneMark.hmm: Alex Lomsadze8, Vardges Ter-Hovhannisyan8, Andrey Kislyuk8, Mark Borodovsky8

Agene: Kasper Munch9, Anders Krogh25

Evigan and craig: Qian Liu10, Axel E. Bernal10, Fernando C. N. Pereira10, Aaron J. Mackey11, David S. Roos11

mgene: Gabriele Schweikert12,13,14, Georg Zeller12,14, Alexander Zien12,15, Jonas Behr12, Cheng Soon Ong12,13, Petra Philips12, Anja Bohlen12, Regina Bohnert12, Fabio De Bona12, Sören Sonnenburg15, Gunnar Rätsch12

glean: Aaron Mackey11, Qian Liu10, Fernando C. N. Pereira10, David S. Roos11

jigsaw: Jonathan E. Allen26, Steven Salzberg16

GlimmerHMM: Mihaela Pertea16, Steven Salzberg16

eugene: Jérôme Gouzy17, Céline Noirot18, Thomas Schiex18

Fgenesh, Fgenesh++, Fgenesh++C: Peter Kosarev19, Igor Seledsov19, Vladimir Molodtsov19, Victor Solovyev19,20

Augustus: Mario Stanke21

ExonHunter: Broňa Brejová22, Tomás Vinar22

maker: Brandi L. Cantarel23, Ian Korf5, Sofia M.C. Robb24, Genis Parra5, Eric Ross24, Barry Moore23, Carson Holt23, Alejandro Sánchez Alvarado24, and Mark Yandell23

1Washington University School of Medicine, St Louis, MO 63108, USA

2Laboratory for Computational Genomics, Washington University, Campus Box 8510, 4444 Forest Park Ave, St. Louis, Missouri 63108, USA

3Wellcome Trust Sanger Institute, Wellcome Trust Genome Campus, Hinxton, Cambridge, CB10 1SA, United Kingdom

4Bioinformatics and Genomics Program, Center for Genomic Regulation, Doctor Aiguader 88, E-08003, Barcelona, Spain

5Department of Molecular and Cellular Biology, University of California Davis, Davis, CA 95616, USA

6Cold Spring Harbor Laboratory, 1 Bungtown Rd, Cold Spring Harbor, NY, 11724, USA

7USDA-ARS NAA Plant, Soil & Nutrition Laboratory Research Unit, Cornell University, Ithaca, NY, 14853, USA

8The Wallace H Coulter Department of Biomedical Engineering and Computational Science and Engineering Division at College of Computing Georgia Tech Atlanta, Georgia 30332, USA

9Centre for Comparative Genomics, Department of Biology, University of Copenhagen, Universitetsparken 15, 2100 Copenhagen, Denmark

10Computer and Information Science Department. University of Pennsylvania, USA

11Department of Biology, Penn Genomics Institute. University of Pennsylvania, USA

12Friedrich Miescher Laboratory, Max Planck Society, Spemannstr. 39, 72076 Tübingen, Germany

13Max Planck Institute for Biological Cybernetics, Spemanstr. 38, 72076 Tübingen, Germany

14Max Planck Institute for Developmental Biology, Spemanstr. 35, 72076 Tübingen,

15Fraunhofer Institute FIRST.IDA, Kekulestr. 7, 12489 Berlin, Germany

16Center for Bioinformatics and Computational Biology, Biomolecular Sciences Building, University of Maryland, College Park, MD 20742, USA

17Unité de Biométrie et Intelligence Artificielle, INRA, UR 875, BP 52627, Chemin de Borde Rouge, 31326, Auzeville, France

18Laboratoire Interactions Plantes Micro-organismes UMR441/2594, INRA/CNRS, F-31Inc., 116 Radio Circle, Suite 400, Mount Kisco, NY,10549,USA

19Softberry Inc., 116 Radio Circle, Suite 400, Mount Kisco, NY,10549,USA

20Department of Computer Science, Royal Holloway, University of London, Egham, Surrey, TW20 0EX, United Kingdom

21Center for Biomolecular Science and Engineering, University of California Santa Cruz, USA

22Department of Biological Statistics and Computational Biology, Cornell University, Ithaca, NY 14853, USA

23Department of Human Genetics, Eccles Institute of Human Genetics, University of Utah, 15 North 2030 East, Salt Lake City, UT 84112-5330, USA

24Department of Neurobiology and Anatomy, Howard Hughes Medical Institute, University of Utah School of Medicine, Salt Lake City, UT 84132, USA

25Bioinformatics Centre, Department of Molecular Biology, University of Copenhagen, Ole Maaloes Vej 5, 2200 Copenhagen N, Denmark

26Lawrence Livermore National Laboratory, PO Box 808, L-174, Livermore, CA, 94551, USA

# 
